# Supplementary material for: Watershed Development and Eutrophying Potable Source-Water Reservoirs in a Warming Temperate/Subtropical Region
Source: MDPI journal article supplement (doi:10.3390/w15224007), 2023-11-17
Supplement: s1 [file s1]

### Supplementary Files

**Table S1.** Potable source-water reservoirs (primary or reserve) omitted from consideration due to failure to meet data requirements, reservoir age, or artificial mixing. In addition, reservoirs with surface area  $\geq 500$  ha at conservation pool were considered except that smaller reservoirs were included if the estimated population served is  $\geq 50,000$ . Data sources other than/in addition to those identified in the Study Area section are indicated; other information is compiled from local and state governments. This list presents examples and is not meant to include all drinking source-water reservoirs in the region.

| Reservoir - surface area;<br>population served with potable<br>water; river system                                     | Water quality data available from<br>public repositories (2010-2020)                                                                                                                                     | Notes                                                                                                                                                                                                                                                                                                               |
|------------------------------------------------------------------------------------------------------------------------|----------------------------------------------------------------------------------------------------------------------------------------------------------------------------------------------------------|---------------------------------------------------------------------------------------------------------------------------------------------------------------------------------------------------------------------------------------------------------------------------------------------------------------------|
| <b>Joe Pool, TX</b><br>3,132 ha; 37,000 people;<br><i>Trinity River</i>                                                | June 2019 – April 2020 only (TX<br>CEQ SWQMP).                                                                                                                                                           | Eutrophic. Hydrilla<br>infestation.                                                                                                                                                                                                                                                                                 |
| <b>Lake Houston, TX</b><br>3,023 ha; > 2 million people; <i>San<br/>Jacinto River</i>                                  | 2010-2019 (Texas Commission on<br>Environmental Quality [TX CEQ]<br>Surface Water Quality Monitoring<br>Program [SWQMP]). Few DO<br>profiles; insufficient data for<br>some key parameters ( $n < 70$ ). | Eutrophic. Some evidence<br>of hypoxia in June and<br>September 2016, and June<br>2017. Large cyanobacteria<br>blooms, taste-and-odor<br>problems.                                                                                                                                                                  |
| <b>Lake Ray Hubbard, TX</b><br>8,498 ha; > 1 million - major<br>potable supply for Dallas;<br><i>Sabine River</i>      | 2010, 2012-2020 (TX CEQ<br>SWQMP), but insufficient data<br>for chl $a$ .                                                                                                                                | Eutrophic. Algal blooms;<br>hydrilla infestation.                                                                                                                                                                                                                                                                   |
| <b>Big Creek Lake (J.B. Converse<br/>Reservoir), AL</b><br>1,457 ha; Mobile, 185,000<br>people; <i>Escatawpa River</i> | 2011, 2014, 2017; insufficient<br>data for chl $a$ and nutrients.                                                                                                                                        | Mesotrophic. Rapidly<br>urbanizing watershed;<br>high sediment loading;<br>PFAs; chl $a$ standard 11 $\mu\text{g}$<br>$\text{L}^{-1}$ ). DO was $< 2 \text{ mg L}^{-1}$ in<br>2/3 of the water column<br>(WC, mid-region) during<br>June – August 2017; ~half<br>of the upper region WC<br>was so affected in July. |
| <b>Inland Lake, AL</b><br>630 ha; Birmingham reserve,<br>~100,000 people; <i>Black Warrior<br/>River</i>               | 2011, 2012, 2017; insufficient<br>data for some key parameters.                                                                                                                                          | Mesotrophic. Deep, clear,<br>mean depth 23 m.                                                                                                                                                                                                                                                                       |
| <b>Lake Tuscaloosa, AL</b><br>2,382 ha; Tuscaloosa - ~101,000<br>people; <i>North River (Black<br/>River)</i>          | 2011, 2012, 2017; insufficient chl $a$<br>data.                                                                                                                                                          | Mesotrophic.                                                                                                                                                                                                                                                                                                        |
| <b>Lake Mitchell, AL</b><br>2,367 ha; ~14,000 people,<br>City of Clanton; <i>Coosa River</i>                           | 2010, 2013, 2015 (few), 2016, 2019;<br>insufficient data for some key<br>parameters.                                                                                                                     | Eutrophic. Algal blooms.<br>Adversely affected by<br>urban runoff and storm<br>sewers.                                                                                                                                                                                                                              |

|                                                                                                                                                               |                                                                                                |                                                                                                                                                                                                                                                                                                                                                                                                                                                     |
|---------------------------------------------------------------------------------------------------------------------------------------------------------------|------------------------------------------------------------------------------------------------|-----------------------------------------------------------------------------------------------------------------------------------------------------------------------------------------------------------------------------------------------------------------------------------------------------------------------------------------------------------------------------------------------------------------------------------------------------|
| <b>Weiss Lake, AL/GA</b><br>12,222 ha; ~180,000 people;<br><i>Coosa River</i>                                                                                 | 2010, 2013, 2016, 2019; insufficient data for NO <sub>x</sub> , so TN could not be calculated. | Eutrophic. “Crappie capital of the world”, but fish consumption advisory due to PCBs; also a PFAS problem.                                                                                                                                                                                                                                                                                                                                          |
| <b>Bear Creek Reservoir, GA</b><br>204 ha; 4 counties including Athens, with ~350,000 people;<br><i>Middle Oconee River</i>                                   | 2017-2020; fish mercury data only in public repositories—data n.a. for some key parameters.    | Eutrophic. Filled in 2002. Cyanobacteria blooms common.                                                                                                                                                                                                                                                                                                                                                                                             |
| <b>Lake McIntosh, Still Branch Reservoir, and Tussahaw Reservoir, GA</b><br>263-593 ha; > 50,000 people each; <i>Flint River, Ocmulgee River</i>              | Water quality data n.a. Filled in 2012, 2005, and 2007, respectively.                          | Still Branch and Tussahaw - vacuolar myelinopathy confirmed (likely related to toxic cyanobacterial epiphyte <i>Aetokthonos hydrillicola</i> [258].<br><br>Eutrophic. Surface/ near-surface hypoxia at 1 or more stations: CWS-7,-6,-5 – total WC (23 July); also at CWS-6: total WC 6 November, 26 March, 23 April morning (~2 mg DO L <sup>-1</sup> just below the surface) and afternoon [218]. Cyanobacteria can cause taste-and-odor problems. |
| <b>Bushy Park (Back-River) Reservoir, SC</b><br>324 ha; Charleston, etc., ~450,000 people; <i>Back River</i> , also <i>Cooper River</i> via the Durham Canal) | 1.5 yr of water quality data (September 2013 – April 2015) [218].                              | Eutrophic. Cyanobacteria blooms; invasive macrophytes (hydrilla, water hyacinth, water lettuce <i>Pistia stratiotes</i> , water primrose <i>Ludwigia uruguayensis</i> , etc.).                                                                                                                                                                                                                                                                      |
| <b>Goose Creek Reservoir, SC</b><br>243 ha; reserve for Charleston; <i>Cooper River</i>                                                                       | 2010-2019 (SCDHEC), but no DO profiles, and data for key parameters uneven across years.       | Eutrophic. Extended periods of oxygen depletion previously reported below the thermocline. Massive high-biomass algal blooms.                                                                                                                                                                                                                                                                                                                       |
| <b>Lake Greenwood, SC</b><br>4,613 ha; > 100,000 people; <i>Saluda River</i>                                                                                  | 2010, 2012-2016; insufficient data for chl <sub>a</sub> , no DO depth profiles                 | Eutrophic. Algal blooms can cause taste-and-odor problems; harmful cyanobacteria blooms since 2013; hydrilla and aetokthonotoxin confirmed [133].                                                                                                                                                                                                                                                                                                   |
| <b>Lake Hartwell, SC</b><br>22,662 ha; ~230,000 people; <i>Savannah, Tugaloo, Seneca Rivers</i>                                                               | 2010-2020; no DO profiles                                                                      | Eutrophic. Algal blooms can cause taste-and-odor problems; harmful cyanobacteria blooms since 2013; hydrilla and aetokthonotoxin confirmed [133].                                                                                                                                                                                                                                                                                                   |

|                                                                                                                                            |                                                                                                            |                                                                                                                                                                                                                                                                                                                            |
|--------------------------------------------------------------------------------------------------------------------------------------------|------------------------------------------------------------------------------------------------------------|----------------------------------------------------------------------------------------------------------------------------------------------------------------------------------------------------------------------------------------------------------------------------------------------------------------------------|
| <b>Lake Keowee, SC</b><br>7,487 ha; Greenville, 72,100 people; <i>Keowee River</i>                                                         | 2010, 2012-2016; insufficient data for chl <sub>a</sub> , no DO depth profiles                             | Eutrophic. Much of the shoreline is heavily impacted by development.                                                                                                                                                                                                                                                       |
| <b>Lake Marion, SC</b><br>44,515 ha; ~125,000 people served/planned; <i>Santee River</i>                                                   | 2010-2020 - but DO depth profiles and chl <sub>a</sub> data n.a.                                           | Eutrophic throughout, although TSIs are higher in headwaters than near dam. Evidence of hypoxia. Invasive salvinia, hydrilla, water hyacinth.                                                                                                                                                                              |
| <b>Lake Moultrie, SC</b><br>24,443 ha; 40,000 people; <i>Santee-Cooper River</i>                                                           | 2010, 2011, 2016; some parameters in 2017, 2018. But DO depth profiles and chl <sub>a</sub> data n.a.      | Eutrophic. Extensive hypoxia; major algal blooms, invasive macrophytes (e.g., hydrilla) treated with herbicides.                                                                                                                                                                                                           |
| <b>Lake Murray, SC</b><br>19,425 ha; Columbia etc., ~300,000 people; <i>Saluda River</i>                                                   | 2010-2017, 2019, 2020 (SCDHEC); but DO depth profiles n.a., and key parameters uneven across years.        | Eutrophic. Evidence of hypoxia. Cyanobacteria can cause taste-and-odor problems; vacuolar myelinopathy confirmed (likely related to toxic cyanobacterial epiphyte <i>Aetokthonos hydrillicola</i> ) [133].                                                                                                                 |
| <b>Lake Wylie (Wateree), SC</b><br>5,423 ha; ~89,000 people; <i>Catawba River</i>                                                          | 2010-2020, but only 2 yr of DO depth profiles (2019 with surface/near surface hypoxia, and 2020) [219,259] | Eutrophic. 2019 - at site CL089 (near dam), DO was < 2.5 mg L <sup>-1</sup> for 2 weeks (September 26 –October 10) within 1.1 m of the surface, also < 2.5 mg L <sup>-1</sup> at the surface for ~4 days in mid-October (total depth ~17 m). Major planktonic and benthic harmful cyanobacteria blooms; invasive hydrilla. |
| <b>City Lake (Arnold Koonce City Lake), NC</b><br>219 ha; City of High Point, most water for 114,100 people; <i>Deep River (Cape Fear)</i> | 2010-2020; but artificially aerated hypolimnion.                                                           | Eutrophic. Algal blooms can cause taste-and-odor problems.                                                                                                                                                                                                                                                                 |
| <b>Lake Randleman, NC</b><br>1,204 ha; Greensboro etc., 298,300 people; <i>Deep River (Cape Fear)</i>                                      | 2011, 2013, 2015, 2018; but filled in 2004.                                                                | Eutrophic. PFAS; 1,4-dioxane. Sewage discharges to the reservoir (e.g., from the City of High Point).                                                                                                                                                                                                                      |

|                                                                                                                   |                                                                                |                                                                                                               |
|-------------------------------------------------------------------------------------------------------------------|--------------------------------------------------------------------------------|---------------------------------------------------------------------------------------------------------------|
| <b>Mountain Island Lake, NC</b><br>1,327 ha; Charlotte etc.,<br>etc., > 1 million people;<br><i>Catawba River</i> | 2010-2020; no DO profiles.                                                     | Eutrophic. Coal ash contamination (high arsenic).                                                             |
| <b>W. Kerr Scott Lake, NC</b><br>597 ha; Wilkesboro etc.,<br>~60,000 people; <i>Yadkin River</i>                  | 2014, 2019; insufficient data for chl $a$ and nutrients; no DO depth profiles. | Mesotrophic to eutrophic; chl $a$ can exceed the state standard of 40 $\mu\text{g L}^{-1}$ .                  |
| <b>Oak Hollow Lake, NC</b><br>328 ha; Backup for the City of High Point; <i>Deep River</i> ( <i>Cape Fear</i> )   | 2010-2020; but artificially aerated hypolimnion.                               | Eutrophic. Algal blooms can cause taste-and-odor problems.                                                    |
| <b>Lake Benson, NC</b><br>263 ha; ~34,000 people; Garner, secondary supply for Raleigh; <i>Neuse River</i>        | 2010, 2015 only (City of Raleigh).                                             | Eutrophic. <i>Microseira</i> ( <i>Lyngbya</i> ) <i>wollei</i> and mild to severe summer cyanobacteria blooms. |

---

**Table S2.** The years, sites, frequency, depth, and number of samples (*n*) analyzed for environmental and water quality parameters in each reservoir (summers, 2010-2020; n.a., not available; temp., temperature; satn., saturation).

[illegible]

|              |                                                                                                                                                                                                                                      |     |     |     |     |     |     |     |     |       |          |      |     |
|--------------|--------------------------------------------------------------------------------------------------------------------------------------------------------------------------------------------------------------------------------------|-----|-----|-----|-----|-----|-----|-----|-----|-------|----------|------|-----|
| Guntersville | 2013, 2015, 2018; surface; 11 sites (GUNM-1 to GUNM-10) except DO depth profiles (upper GUNM-1, lower GUNM-10); monthly                                                                                                              | 891 | 125 | 882 | 125 | 125 | 125 | 125 | 125 | 125   | 125      | n.a. | 125 |
| Neely Henry  | 2010, 2013, 2016, 2019; surface ( $\leq 3.8$ m); 14 sites (NEES-1, NEES-2B, NEES-3, NEES-5-11, NEES-6A, NEES 16-18) except DO depth profiles (upper NEES-2B, middle NEES-3, lower NEES-1); monthly                                   | 615 | 133 | 598 | 123 | 126 | 126 | 126 | 131 | 127   | 122- 126 | n.a. | 130 |
| Lay          | 2010, 2013, 2016, 2019; sur-face; 11 sites (LAYC-1 to -3, LAYC-6-12, LAYC-18) except DO depth profiles (upper LAYC-2, middle LAYC-3, lower LAYC-1); and except 2018 (all parameters except DO, 1 site, LAYC-1; DO as above); monthly | 809 | 131 | 825 | 130 | 98  | 101 | 98  | 129 | 88-89 | 89- 99   | n.a. | 130 |

[illegible]

|                     |                                                                                                                                                                                                                                                            |           |      |      |      |     |     |     |     |         |         |      |     |
|---------------------|------------------------------------------------------------------------------------------------------------------------------------------------------------------------------------------------------------------------------------------------------------|-----------|------|------|------|-----|-----|-----|-----|---------|---------|------|-----|
| Lanier              | 2010-2020; surface (< 1 m or PZ < 4 m); 10 sites (3913, 3995, 3998, 4001, 4005, 4007, 4010, 4012, 4019, 4028) except DO depth profiles (upper 3913, middle 4001, lower 4028); monthly                                                                      | 1496–1504 | 390  | 764  | 409  | 409 | 409 | 409 | 409 | 409     | 409     | 409  | 410 |
| Norman <sup>a</sup> | 2010-2020; surface or PZ (twice Secchi, ≤ 4.6 m); 15 sites (1.0, 2.0, 5.0, 7.5, 8.0, 9.5, 11.0, 11.5, 12.5, 13.0, 15.0, 15.9, 62.0, 69.0, MRSVINT) except DO depth profiles (upper 15.9, middle 11.0, lower 1.0); once per summer except Secchi monthly    | 4488–4541 | 394  | 4524 | n.a. | 117 | 126 | 117 | 117 | 118–135 | 119–126 | n.a. | 111 |
| Jordan <sup>a</sup> | 2010-2019; PZ (≤ 4 m); 20 sites (86CUPS, MC01-03, 86C, 81A1B, 81A1C, 86F, 87B3, 87D, 880A, 55C, 55C1-6, 55D, 55E) except DO depth profiles (upper 86F, middle 87D, lower 55E); TOC 2017 only; biweekly through 6/16, then monthly except bimonthly in 2018 | 2563      | n.a. | n.a. | 111  | 806 | 817 | 806 | 817 | 693     | 682–806 | 11   | 823 |



|       |                                                                                                                                                                                               |      |     |      |     |     |     |     |     |             |     |     |     |
|-------|-----------------------------------------------------------------------------------------------------------------------------------------------------------------------------------------------|------|-----|------|-----|-----|-----|-----|-----|-------------|-----|-----|-----|
| Falls | 2010-2020; $\leq 1$ m or PZ;<br>13 sites (FL 1-6, FLIN_1,<br>FLINC, FL50_1, FL50C,<br>FL85_1, FL85C, LC1)<br>except DO depth profiles<br>(upper FL85, middle<br>FL50, lower FLIN);<br>monthly | 2960 | 366 | 2922 | 794 | 792 | 794 | 791 | 793 | 793–<br>795 | 793 | 794 | 794 |
|-------|-----------------------------------------------------------------------------------------------------------------------------------------------------------------------------------------------|------|-----|------|-----|-----|-----|-----|-----|-------------|-----|-----|-----|

<sup>a</sup> Norman DO sampling varied by site, from once per summer to twice weekly during summers, and the sampling frequency decreased especially in the last 3 yr. Jordan DO data were collected biweekly in summers of 2010, 2011, 2012, and 2014.

<sup>b</sup> Violations of state chl $a$  standards were assessed as follows: Eagle Mountain (all stations),  $> 26.7 \mu\text{g L}^{-1}$ ; Cedar Creek (stations 16748 and 16749,  $> 23.47 \mu\text{g L}^{-1}$ ) [89,260]. Chl $a$  standards for AL waters included Guntersville (station GUNM-10,  $> 18 \mu\text{g L}^{-1}$ ), R.L. Harris (stations RLHR-1, RLHR-2, and RLHR-3,  $> 10 \mu\text{g L}^{-1}$ ; station RLHR-4,  $> 12 \mu\text{g L}^{-1}$ ); Lay (stations C-1, C-2, and C-3,  $> 17 \mu\text{g L}^{-1}$ ); Neely Henry (stations 1, 2B, 3, 11, and 18,  $> 17 \mu\text{g L}^{-1}$ ); Martin (stations MARE-1, MARE-2, MARE-3, MARE-4, and MARE-5,  $> 5 \mu\text{g L}^{-1}$ ) [134]. Georgia waters included Allatoona (stations 4494 and 4556,  $> 10 \mu\text{g L}^{-1}$ ; station 4497,  $> 12 \mu\text{g L}^{-1}$ ; station 4502,  $> 14 \mu\text{g L}^{-1}$ ; station 4553,  $> 15 \mu\text{g L}^{-1}$ ); W.F. George (station 4097,  $> 18 \mu\text{g L}^{-1}$ ; station 4103,  $> 15 \mu\text{g L}^{-1}$ ); Lanier (stations 3913, 3995, and 3998,  $> 10 \mu\text{g L}^{-1}$ ; station 4001,  $> 7 \mu\text{g L}^{-1}$ ; stations 4005, 4407, 4010, 4012, and 4019,  $> 6 \mu\text{g L}^{-1}$ ; and station 4028,  $> 5 \mu\text{g L}^{-1}$ ) [47]. North Carolina waters included Norman, Jordan, and Falls ( $> 40 \mu\text{g L}^{-1}$ ) [45].
